# Supplementary material
Source: PubMed Central journal article supplement (PMC6200934)
Supplement: supp_RA118.004073_138298_1_supp_190241_ps68s9.pdf [file supp_RA118.004073_138298_1_supp_190241_ps68s9.pdf]

Supplemental Figure 1

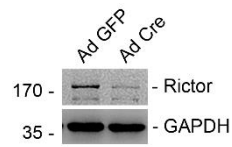

**Supplemental Figure 1.** Primary cultured fibroblasts were generated from kidneys of *Rictor<sup>fl/fl</sup>* mice. The fibroblasts were infected with Adeno-Cre to induce Rictor gene deletion. Fibroblasts infected with Adeno-GFP were used as control. After 48 hours, cell lysates were collected. Western blotting assay showing the protein abundance for Rictor in fibroblasts.

Supplemental Figure 2

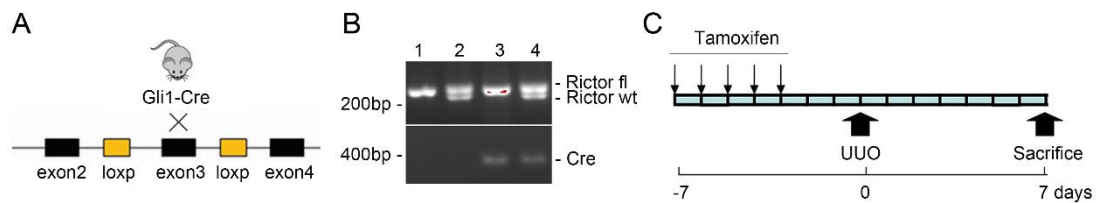

**Supplemental Figure 2.** (A) Breeding strategy. (B) PCR analysis for genotyping the mice. Lane 1: *Gli1-Cre<sup>-/-</sup>*, *Rictor<sup>fl/fl</sup>*; lane 2: *Gli1-Cre<sup>-/-</sup>*, *Rictor<sup>fl/wt</sup>*; lane 3: *Gli1-Cre<sup>+/-</sup>*, *Rictor<sup>fl/fl</sup>*; lane 4: *Gli1-Cre<sup>+/-</sup>*, *Rictor<sup>fl/wt</sup>*. (C) Diagram showing the strategy for inducing fibroblast Rictor gene deletion in *Gli1-Cre<sup>+/-</sup>*, *Rictor<sup>fl/fl</sup>* mice.
